# Supplementary material
Source: ML conference proceedings conference paper supplement (https://openreview.net/forum?id=oud6xgdpqVM)
Supplement: supplementary_material [file attachment]

## Supplementary Materials

In this supplementary, Section A shows the detailed definition of **Theorem 1** (*Contraction Metric*), and proof of **Proposition 2** (*Policy Evaluation*), **Proposition 3** (*Policy Improvement*), **Theorem 4** (*Convergence*) and **Theorem 5** (*Training Acceleration*). Section B shows the detailed nominal dynamic model of quadrotor, and description of parameters. Section C shows the algorithm details of QuaDUE, combining with DDPG algorithm. Section D shows the algorithm details of the reference trajectory generation, i.e., Kino-JSS. Section E gives the implementation details of QuaDUE-CCM.

### A Detailed definition of Contraction; and proof of Proposition 2, Proposition 3, Theorem 4 and Theorem 5

**Contraction** is described as follows. We firstly consider general time-variant autonomous systems  $\dot{x} = f_c(x, t)$ . Then we have  $\delta\dot{x} = \frac{\partial f_c}{\partial x}(x, t)\delta x$ , where  $\delta x$  is a virtual displacement. Next, two neighboring trajectories are considered in the field  $\dot{x} = f_c(x, t)$ . The square distance between these two trajectories is defined as  $\delta x^T \delta x$ , where the rate of change is given by  $\frac{d}{dt}(\delta x^T \delta x) = 2\delta x^T \delta\dot{x} = 2\delta x^T \frac{\partial f_c}{\partial x} \delta x$ . Let  $\lambda_m(x, t) < 0$  be the largest eigenvalue of the symmetrical part of the Jacobian  $\frac{\partial f_c}{\partial x}$  such that there exists  $\frac{d}{dt}(\delta x^T \delta x) \leq 2\lambda_m \delta x^T \delta x$ . Therefore, we have  $\|\delta x\| \leq e^{\int_0^t \lambda_m(x, t) dt} \|\delta x_0\|$ . Such a system can be called **contracting**. Therefore, we have the following **Theorem 1**.

**Theorem 1** (*Contraction Metric*): In a control-affine system, if there exists:  $\dot{M} + \text{sym}(M(A + BK)) + 2\lambda M \prec 0$ , then the inequality  $\|\mathbf{x}(t) - \mathbf{x}_{ref}(t)\| \leq R e^{-\lambda t} \|\mathbf{x}(0) - \mathbf{x}_{ref}(0)\|$  with  $\forall t \geq 0, R \geq 1$  and  $\lambda > 0$  holds, where  $A = A(\mathbf{x}, \mathbf{u})$  and  $B = B(\mathbf{x})$  are defined above, and  $\dot{M} = \partial_{f(\mathbf{x})+g(\mathbf{x})\mathbf{u}} M = \sum_{i=1}^n \frac{\partial M}{\partial x^i} \dot{x}^i$ ,  $\text{sym}(M) = M + M^T$ , and  $\mathbf{x}_{ref}(t)$  is a sequential reference trajectory. Therefore, the system is contracting.

*Proof* can be found in [1, 2].

**Proposition 2** (*Policy Evaluation*): Given a deterministic policy  $\pi$ , a quantile approximator  $\Pi_{W_1}$  and  $Z_{k+1}(\mathbf{s}, \mathbf{a}) = \Pi_{W_1} \mathcal{T}^\pi Z_k(\mathbf{s}, \mathbf{a})$ , the sequence  $Z_k(\mathbf{s}, \mathbf{a})$  converges to a unique fixed point  $\tilde{Z}_\pi$  under the maximal form of the  $\infty$ -Wasserstein metric  $\bar{d}_\infty$ .

*Proof*: The combined operator  $\Pi_{W_1} \mathcal{T}^\pi$  is an  $\infty$ -contraction [3], as there exists:

$$\bar{d}_\infty(\Pi_{W_1} \mathcal{T}^\pi Z_1, \Pi_{W_1} \mathcal{T}^\pi Z_2) \leq \bar{d}_\infty(Z_1, Z_2) \quad (1)$$

Based on the Banach's fixed point theorem, we have a unique fixed point  $\tilde{Z}_\pi$  of  $\mathcal{T}^\pi$ . Since all moments of  $Z$  are bounded in  $Z_\theta(\mathbf{s}, \mathbf{a}) := \frac{1}{N} \sum_{i=1}^N \delta_{q_i(\mathbf{s}, \mathbf{a})}$ , the sequence  $Z_k(\mathbf{s}, \mathbf{a})$  converges to  $\tilde{Z}_\pi$  in  $\bar{d}_\infty$  for  $p \in [1, \infty]$ . ■

**Proposition 3** (*Policy Improvement*): Denoting an old policy by  $\pi_{old}$  and a new policy by  $\pi_{new}$ , there exists  $\mathbb{E}[Z(\mathbf{s}, \mathbf{a})]^{\pi_{new}}(\mathbf{s}, \mathbf{a}) \geq \mathbb{E}[Z(\mathbf{s}, \mathbf{a})]^{\pi_{old}}(\mathbf{s}, \mathbf{a}), \forall \mathbf{s} \in \mathcal{S}$  and  $\forall \mathbf{a} \in \mathcal{A}$ .

*Proof*: We firstly denote the expectation of  $Z(\mathbf{s}, \mathbf{a})$  by  $Q(\mathbf{s}, \mathbf{a})$ . Then based on:

$$\begin{aligned} \mathcal{T}Z(\mathbf{s}, \mathbf{a}) &:= R(\mathbf{s}, \mathbf{a}) + \gamma Z(\mathbf{s}', \arg\max_{\mathbf{a}', \mathbf{p}, R} \mathbb{E}[Z(\mathbf{s}', \mathbf{a}')]) \\ Z_\theta(\mathbf{s}, \mathbf{a}) &:= \frac{1}{N} \sum_{i=1}^N \delta_{q_i(\mathbf{s}, \mathbf{a})} \end{aligned} \quad (2)$$

there exists:

$$V^\pi(s_t) = \mathbb{E}_\pi Q^\pi(s_t, \pi(s_t)) \leq \max_{\mathbf{a} \in \mathcal{A}} \mathbb{E}_\pi Q^\pi(s_t, \mathbf{a}) = \mathbb{E}_{\pi'} Q^\pi(s_t, \pi'(s_t)) \quad (3)$$

where  $\mathbb{E}_\pi[\cdot] = \sum_{a \in \mathcal{A}} \pi(a|s)[\cdot]$ , and  $V^\pi(s) = \mathbb{E}_\pi \mathbb{E}[Z_k(s, a)]$  is the value function. According to Equation 2 and Equation 3, it yields:

$$\begin{aligned}
Q^{\pi^{old}} &= Q^{\pi^{old}}(s_t, \pi_{new}(s_t)) = r_{t+1} + \gamma \mathbb{E}_{s_{t+1}} \mathbb{E}_{\pi^{old}} Q^{\pi^{old}}(s_{t+1}, \pi^{old}(s_{t+1})) \\
&\leq r_{t+1} + \gamma \mathbb{E}_{s_{t+1}} \mathbb{E}_{\pi_{new}} Q^{\pi^{old}}(s_{t+1}, \pi_{new}(s_{t+1})) \\
&\leq r_{t+1} + \mathbb{E}_{s_{t+1}} \mathbb{E}_{\pi_{new}} [\gamma r_{t+2} + \gamma^2 \mathbb{E}_{s_{t+2}} Q^{\pi^{old}}(s_{t+2}, \pi_{new}(s_{t+2}))] \\
&\leq r_{t+1} + \mathbb{E}_{s_{t+1}} \mathbb{E}_{\pi_{new}} [\gamma r_{t+2} + \gamma^2 r_{t+3} + \dots] = r_{t+1} + \mathbb{E}_{s_{t+1}} V^{\pi_{new}}(s_{t+1}) \\
&= Q^{\pi_{new}}
\end{aligned} \tag{4}$$

Thus, there exists  $\mathbb{E}[Z(s, a)]^{\pi_{new}}(s, a) \geq \mathbb{E}[Z(s, a)]^{\pi^{old}}(s, a)$ .  $\blacksquare$

**Theorem 4 (Convergence):** Denoting the policy of the  $i$ -th policy improvement by  $\pi^i$ , there exists  $\pi^i \rightarrow \pi^*$ ,  $i \rightarrow \infty$ , and  $\mathbb{E}[Z_k(s, a)]^{\pi^*}(s, a) \geq \mathbb{E}[Z_k(s, a)]^{\pi^i}(s, a)$ ,  $\forall s \in \mathcal{S}$  and  $\forall a \in \mathcal{A}$ .

*Proof:* Proposition 3 shows that  $\mathbb{E}[Z(s, a)]^{\pi^i} \geq \mathbb{E}[Z(s, a)]^{\pi^{i-1}}$ , thus  $\mathbb{E}[Z(s, a)]^{\pi^i}$  is monotonically increasing. The immediate reward is defined as:

$$R_{t+1}(s, a, \theta) = R_{contraction}(s, a, \theta) + R_{track}(s, a) \tag{5}$$

Extending to Equation 5, the reward function is defined as:

$$\begin{aligned}
R_{contraction}(s, a, \theta) &= -\omega_{c,1}[\underline{m}I - M]_{ND}(s) - \omega_{c,2}[M - \overline{m}I]_{ND}(s) \\
&\quad - \omega_{c,3}[\widehat{C}_m + 2\lambda M]_{ND}(s, a, \theta) \\
R_{track}(s, a) &= -(\mathbf{x}_t(s, a) - \mathbf{x}_{ref,t})^T H_1 (\mathbf{x}_t(s, a) - \mathbf{x}_{ref,t}) - \mathbf{u}_t^T(s, a) H_2 \mathbf{u}_t(s, a)
\end{aligned} \tag{6}$$

where  $\underline{m}$ ,  $\overline{m}$  are hyper-parameters,  $H_1$  and  $H_2$  are positive definite matrices, and  $[A]_{ND}$  is for penalizing positive definiteness where  $[A]_{ND} = 0$  iff.  $A < 0$ , and  $[A]_{ND} \geq 0$  iff.  $A \succeq 0$ .

According to Equation 1, Equation 5 and Equation 6, the first moment of  $Z$ , i.e.,  $\mathbb{E}[Z(s, a)]^{\pi^i}$ , is upper bounded. Therefore, the sequential  $\mathbb{E}[Z(s, a)]^{\pi^i}$  converges to an upper limit  $\mathbb{E}[Z(s, a)]^{\pi^*}$  satisfying  $\mathbb{E}[Z_k(s, a)]^{\pi^*}(s, a) \geq \mathbb{E}[Z_k]^{\pi^i}$ .  $\blacksquare$

**Theorem 5 (Training Acceleration):** In the training process of the distribution RL (i.e. QuaDUE):

- 1) Let sampling steps  $T = 4kl^2 E_J(\theta_0)/\tau^2$ , if there exists  $\kappa \leq 0.25\tau^2/\sigma^2$ , the  $J_\theta$  optimized by stochastic gradient descend converges to a  $\tau$ -stationary point.
- 2) Let sampling steps  $T = kl^2 E_J(\theta_0)/(\kappa\tau^2)$ , if there exists  $\kappa > 0.25\tau^2/\sigma^2$ , the  $J_\theta$  optimized by stochastic gradient descent will not converge to a  $\tau$ -stationary point.

*Proof:* As  $J_\theta(p^{s,a}, a_\theta^{s,a})$  is  $kl^2$ -smooth, we have:

$$\begin{aligned}
E_J(\theta_{t+1}) - E_J(\theta_t) &\leq \langle \nabla E_J(\theta_t), \theta_{t+1} - \theta_t \rangle + (kl^2/2) \|\theta_{t+1} - \theta_t\|^2 \\
&= -\iota \langle \nabla E_J(\theta_t), \nabla J_\theta(p^{s,a}, a_\theta^{s,a}) \rangle + (kl^2 \iota^2/2) \|\nabla J_\theta(p^{s,a}, a_\theta^{s,a})\|^2 \\
&\leq -(\iota/2) \|\nabla E_J(\theta_t)\|^2 + (\iota/2) \|\nabla E_J(\theta_t) - J_\theta(p^{s,a}, a_\theta^{s,a})\|^2
\end{aligned} \tag{7}$$

Next we take the expected value of Equation 7 and consider  $T$  steps:

$$\begin{aligned}
\mathbb{E}[E_J(\theta_T) - E_J(\theta_0)] &\leq \mathbb{E}\left[\sum_{t=0}^{T-1} -(\iota/2) \|\nabla E_J(\theta_t)\|^2\right] + \mathbb{E}\left[\sum_{t=0}^{T-1} (\iota/2) \|\nabla E_J(\theta_t) - J_\theta(p^{s,a}, a_\theta^{s,a})\|^2\right] \\
&\leq -(\iota/2) \sum_{t=0}^{T-1} \mathbb{E}[\|\nabla E_J(\theta_t)\|^2] + (\iota/2)[(1 - 1/(1 + \kappa))\sigma^2 + (\kappa/(1 + \kappa))\sigma^2]
\end{aligned} \tag{8}$$

According to Equation 8 above, if we have a first-order stationary point at  $T$  step, then:

$$(1/T) \sum_{t=0}^{T-1} \mathbb{E}[\|\nabla E_J(\theta_t)\|^2] \leq 2kl^2 E_J(\theta_0)/T + 2\kappa\sigma^2 \tag{9}$$

If we have  $T = 4kl^2E_J(\theta_0)/\tau^2$  and  $\kappa \leq 0.25\tau^2/\sigma^2$ , then  $J_\theta$  converges to a  $\tau$ -stationary point with  $(1/T) \sum_{t=0}^{T-1} \mathbb{E}[\|\nabla E_J(\theta_t)\|^2] \leq \tau^2$ . Thus, (1) is proved. If we have  $T = kl^2E_J(\theta_0)/(\kappa\tau^2)$  and  $\kappa > 0.25\tau^2/\sigma^2$ , then  $(1/T) \sum_{t=0}^{T-1} \mathbb{E}[\|\nabla E_J(\theta_t)\|^2] \leq 4\kappa\tau^2$ , where the stationary point is dependent on  $\kappa$ , i.e., the degree of the approximation. Therefore, (2) is proved. ■

## B Nominal Dynamic Model of Quadrotor

The quadrotor is assumed as a six Degrees of Freedom (DoF) rigid body of mass  $m$ , i.e., three linear motions and three angular motions [4]. Different from [5, 6], the aerodynamic effect (disturbance)  $e_f$  is integrated into the quadrotor dynamic model as follows [7]:

$$\begin{aligned}\dot{\mathbf{P}}_{WB} &= \mathbf{V}_{WB} \\ \dot{\mathbf{V}}_{WB} &= \mathbf{g}_W + \frac{1}{m}(\mathbf{q}_{WB} \odot \mathbf{c} + \mathbf{e}_f) \\ \dot{\mathbf{q}}_{WB} &= \frac{1}{2}\Lambda(\boldsymbol{\omega}_B)\mathbf{q}_{WB} \\ \dot{\boldsymbol{\omega}}_B &= \mathbf{J}^{-1}(\boldsymbol{\tau}_B - \boldsymbol{\omega}_B \times \mathbf{J}\boldsymbol{\omega}_B)\end{aligned}\tag{10}$$

where  $\mathbf{P}_{WB}$ ,  $\mathbf{V}_{WB}$  and  $\mathbf{q}_{WB}$  are the position, linear velocity and orientation expressed in the world frame, and  $\boldsymbol{\omega}_B$  is the angular velocity expressed in the body frame [7];  $\mathbf{c}$  is the collective thrust  $\mathbf{c} = [0, 0, \sum T_i]^T$ ; the operator  $\odot$  denotes a rotation of the vector by the quaternion;  $\boldsymbol{\tau}_B$  is the body torque;  $\mathbf{J} = \text{diag}(j_x, j_y, j_z)$  is the diagonal moment of inertia matrix;  $\mathbf{g}_W = [0, 0, -g]^T$ ; and, the skewsymmetric matrix  $\Lambda(\boldsymbol{\omega})$  is defined as:

$$\Lambda(\boldsymbol{\omega}) = \begin{bmatrix} 0 & -\omega_x & -\omega_y & -\omega_z \\ \omega_x & 0 & -\omega_z & -\omega_y \\ \omega_y & -\omega_z & 0 & \omega_x \\ \omega_z & \omega_y & -\omega_x & 0 \end{bmatrix}\tag{11}$$

Then we reformulate Equation 10 in its control-affine form:

$$\dot{\mathbf{x}} = \mathbf{f}(\mathbf{x}, \mathbf{e}_{f_k}) + \mathbf{g}(\mathbf{x})\mathbf{u} + \mathbf{w}\tag{12}$$

where  $\mathbf{f} : \mathbb{R}^n \mapsto \mathbb{R}^n$  and  $\mathbf{g} : \mathbb{R}^n \mapsto \mathbb{R}^{n \times m}$  are assumed by the standard as Lipschitz continuous [8, 9].  $\mathbf{x} = [\mathbf{P}_{WB}, \mathbf{V}_{WB}, \mathbf{q}_{WB}, \boldsymbol{\omega}_B]^T \in \mathbb{X}$ ,  $\mathbf{u} = T_i \forall i \in (0, 3) \in \mathbb{U}$  and  $\mathbf{w} \in \mathbb{W}$  are the state, input and additive uncertainty of the dynamic model, where  $\mathbb{X} \subseteq \mathbb{R}^n$ ,  $\mathbb{U} \subseteq \mathbb{R}^{n_u}$  and  $\mathbb{W} \subseteq \mathbb{R}^{n_w}$  are compact sets as the state, input and uncertainty space, respectively. Given an input  $: \mathbb{R}^{\geq 0} \mapsto \mathbb{U}$  and an initial state  $x_0 \in \mathbb{X}$ , our goal is to design a quadrotor tracking controller  $\mathbf{u}$  such that the state trajectory  $\mathbf{x}$  can track any reference state trajectory  $\mathbf{x}_{ref}$  (satisfied the quadrotor dynamic limits) under a bounded uncertainty  $\mathbf{w} : \mathbb{R}^{\geq 0} \mapsto \mathbb{W}$ .

## C The detailed algorithm of QuaDUE

The objective of this work is to design a distributional-RL-based estimator for CCM uncertainty, which we define as combined wind estimation and CCM uncertainty estimation, for tracking the reference state  $\mathbf{x}_{ref}$  of the nominal model (Equation 10). The detailed algorithm of QuaDUE is shown in Algorithm 1.

## D The detailed algorithm of Kino-JSS

Quadrotor route searching primarily focuses on robustness, feasibility and efficiency. The Kino-RS algorithm [10] is a robust and feasible online searching approach. However, the searching loop is derived from the hybrid-state A\* algorithm, making it relatively inefficient in obstacle-dense environments. On the other hand, JPS offers robust route searching, and runs at an order of magnitude

---

**Algorithm 1** QuaDUE

---

**Input:**  $s_k, s_{k+1}, \mathbf{u}_k, \theta^\mu, \theta^Q$ **Output:**  $\mathbf{a}_k$ 

- 1: **Initialize:**
    - $\theta^{\mu^t} \leftarrow \theta^\mu, \theta^{Q^t} \leftarrow \theta^Q$  update the target parameters from the predicted parameters
    - the replay memory  $D \leftarrow D_{k-1}$
    - the batch  $B$ , and its size
    - a small threshold  $\xi \in \mathbb{R}_+$
    - the random option selection probability  $\epsilon$  - the option termination probability  $\beta$
    - quantile estimation functions  $\{q_i\}_{i=1, \dots, N}$
  - 2: **Repeat**
  - 3: **for** each sampling step from  $D$  **do**
  - 4:   Select a candidate option  $z_k$  from  $\{z^0, z^1, \dots, z^M\}$
  - 5:    $z_k \leftarrow \begin{cases} z_{k-1} & w.p. 1 - \beta \\ \text{random option} & w.p. \beta\epsilon \\ \text{argmax}_z Q(\mathbf{s}_k, z) & w.p. \beta(1 - \epsilon) \end{cases}$
  - 6:   Execute  $w_k$ , get reward  $r_k$  and the next state  $\mathbf{s}_{k+1}$
  - 7:    $D.\text{Insert}([\mathbf{s}_k, \mathbf{u}_k, \mathbf{r}_k, \mathbf{s}_{k+1}])$
  - 8:    $B \leftarrow D.\text{sampling}$
  - 9:    $y_{k,i} \leftarrow \rho_{\tau_i}^K(r_k + \gamma q'_i(\mathbf{s}_{k+1}, w_k^*))$
  - 10:    $J_{\theta^\mu} \leftarrow \frac{1}{N} \sum_{i=1}^N \sum_{i'=1}^N [y_{k,i'} - q_i(\mathbf{s}_k, w_k)]$
  - 11:    $y \leftarrow \beta \text{argmax}_{z'} Q(\mathbf{s}_{k+1}, z') + (1 - \beta)Q(\mathbf{s}_{k+1}, z_k)$
  - 12:    $J_{\theta^Q} \leftarrow (r_t + \gamma y - Q(\mathbf{s}_t, z_t))^2$
  - 13:    $\theta^\mu \leftarrow \theta^\mu - l_\mu \nabla_{\theta^\mu} J_{\theta^\mu}$
  - 14:    $\theta^Q \leftarrow \theta^Q - l_\theta \nabla_{\theta^Q} J_{\theta^Q}$
  - 15: **end for**
  - 16: **Until** convergence,  $J_Q^\theta < \xi$
- 

faster than the A\* algorithm [11]. A common problem of geometric methods such as JPS and A\* is that, unlike kinodynamic searching, they consider heuristic cost (e.g., distance) but not the quadrotor dynamics and feasibility (e.g., line 5 of Algorithm 3 and line 10 of Algorithm 4) when generating routes [12]. `checkFea()` is the feasibility check to judge the acceleration and velocity constraints based on the quadrotor dynamics. Kino-JSS, proposed in [7], generates a safe and efficient route in unknown environments with aerodynamic disturbances. In [7], Kino-JSS, described by Algorithms 2, 3 and 4, is demonstrated to run an order of magnitude faster than Kino-RS [10] in obstacle-dense environments, whilst maintaining comparable system performance.

---

**Algorithm 2** Kinodynamic Jump Space Search [7]

---

**INPUT:**  $s_{cur}$ **OUTPUT:** *KinoJSSRoute*

- 1: **initialize()**
  - 2:  $openSet.insert(s_{cur})$
  - 3: **while** `!openSet.isEmpty()` **do**
  - 4:    $s_{cur} \leftarrow openSet.pop()$
  - 5:    $closeSet.insert(s_{cur})$
  - 6:   **if** `nearGoal(scur)` **then**
  - 7:     **return** *KinoJSSRoute*
  - 8:   **end if**
  - 9:   **KinoJSSRecursion()**
  - 10: **end while**
- 

$s_{cur}$  denotes the current state,  $s_{pro}$  denotes the propagation of current state under the motion  $m_i$ , and  $E_f$  denotes the aerodynamic disturbance estimated by VID-fusion [13]. In Algorithm 3, *motionSet*,

---

**Algorithm 3** KinoJSSRecursion [7]

---

**INPUT:**  $s_{cur}, E_f, openSet, closeSet$ **OUTPUT:**  $void$ 

```
1:  $motions \leftarrow \text{JSSMotion}(s_{cur}, E_f)$ 
2: for each  $m_i \in motions$  do
3:    $s_{pro} \leftarrow \text{statePropagation}(s_{cur}, m_i)$ 
4:    $inClose \leftarrow closeSet.isContain(s_{pro})$ 
5:   if  $isFree(s_{pro}) \wedge checkFea(s_{pro}, m_i) \wedge inClose$  then
6:     if  $checkOccupiedAround(s_{pro})$  then
7:        $s_{pro}.neighbors \leftarrow \text{JSSNeighbor}(s_{pro})$ 
8:        $cost_{pro} \leftarrow s_{cur}.cost + \text{edgeCost}(s_{pro})$ 
9:        $cost_{pro} \leftarrow cost_{pro} + \text{heuristic}(s_{pro})$ 
10:      if  $!openSet.isContain(s_{pro})$  then
11:         $openSet.insert(s_{pro})$ 
12:      else if  $s_{pro}.cost \leq cost_{pro}$  then
13:        continue
14:      end if
15:       $s_{pro}.parent \leftarrow s_{cur}$ 
16:       $s_{pro}.cost \leftarrow cost_{pro}$ 
17:    else
18:       $\text{KinoJSSRecursion}()$ 
19:    end if
20:  else
21:    continue
22:  end if
23: end for
```

---

---

**Algorithm 4** JSSMotion [7]

---

**INPUT:**  $s_{cur}, E_f$ **OUTPUT:**  $motions$ 

```
1:  $E_{fcor} \leftarrow E_f + \text{GaussianNoise}()$ 
2: for each  $m_i \in motionSet$  do
3:    $m_{cor} \leftarrow m_i + E_{fcor}$ 
4:    $motions \leftarrow \text{push\_back}(m_{cor})$ 
5: end for
6:  $neighSize \leftarrow s_{cur}.neighbors.size()$ 
7: while  $neighSize \neq 0$  do
8:    $neighSize = neighSize - 1$ 
9:    $neighMotion \leftarrow \text{posToMotion}(s_{cur}.neighbors)$ 
10:  if  $checkFea(s_{cur}, neighMotion)$  then
11:     $motions \leftarrow \text{push\_back}(neighMotion)$ 
12:  end if
13: end while
14: return  $motions$ 
```

---

Table 1: Parameters of QuaDUE-CCM

| Parameters     | Definition                                                                                   | Values |
|----------------|----------------------------------------------------------------------------------------------|--------|
| $l_{\theta_a}$ | Learning rate of actor                                                                       | 0.0015 |
| $l_{\theta_c}$ | Learning rate of critic                                                                      | 0.0015 |
| $\theta_a$     | Actor neural network: fully connected with two hidden layers (128 neurons per hidden layer)  | -      |
| $\theta_c$     | Critic neural network: fully connected with two hidden layers (128 neurons per hidden layer) | -      |
| $D$            | Replay memory capacity                                                                       | $10^4$ |
| $B$            | Batch size                                                                                   | 256    |
| $\gamma$       | Discount rate                                                                                | 0.9995 |
| -              | Training episodes                                                                            | 1000   |
| $T_s$          | MPC Sampling period                                                                          | 50ms   |
| $N$            | Time steps                                                                                   | 20     |

which is defined as a pyramid shown, offers improved efficiency whilst retaining the advantages of Kino-RS [10].

## E The implementation details of QuaDUE-CCM

The performance of our proposed QuaDUE-CCM is evaluated using a DJI Manifold 2-C (Intel i7-8550U CPU) for real-time computation. We use RotorS MAVs simulator [14], where programmable aerodynamic disturbances can be generated. The nominal force  $n_f$  is estimated by VID-Fusion [13]. The noise bound of aerodynamic forces is set as  $0.5 m/s^2$ , based on the benchmark established in [15]. Since the update frequency of the aerodynamic force  $e_f$  estimation is much higher than our QuaDUE-CCM framework frequency, we sample  $e_f$  based on our framework frequency. We also assume the collective thrust  $c$  is a true value, which is tracked ideally in the simulation platform.

The parameters of our proposed framework are summarized in Table 1. Then we operate a training process by generating external forces in RotorS [14], where the programmable external forces are in the horizontal plane with range  $[-3,3] (m/s^2)$ . The training process has 1000 iterations where the quadrotor state is recorded at  $16 Hz$ . The training process occurs over 1000 iterations. The matrices  $H_1$  and  $H_2$  in Equation 6 are chosen as  $H_1 = diag\{2.5e^{-2}, 2.5e^{-2}, 2.5e^{-2}, 1e^{-3}, 1e^{-3}, 1e^{-3}, 2.5e^{-3}, 2.5e^{-3}, 2.5e^{-3}, 2.5e^{-3}, 1e^{-5}, 1e^{-5}, 1e^{-5}\}$  and  $H_2 = diag\{1.25e^{-4}, 1.25e^{-4}, 1.25e^{-4}, 1.25e^{-4}\}$ , respectively.

## References

- [1] W. Lohmiller and J.-J. E. Slotine. On contraction analysis for non-linear systems. *Automatica*, 34(6):683–696, 1998.
- [2] D. Sun, S. Jha, and C. Fan. Learning certified control using contraction metric. *arXiv preprint arXiv:2011.12569*, 2020.
- [3] W. Dabney, M. Rowland, M. Bellemare, and R. Munos. Distributional reinforcement learning with quantile regression. In *Proceedings of the AAAI Conference on Artificial Intelligence*, volume 32, 2018.
- [4] G. Torrente, E. Kaufmann, P. Föhn, and D. Scaramuzza. Data-driven mpc for quadrotors. *IEEE Robotics and Automation Letters*, 6(2):3769–3776, 2021.
- [5] M. Kamel, T. Stastny, K. Alexis, and R. Siegwart. Model predictive control for trajectory tracking of unmanned aerial vehicles using robot operating system. In *Robot operating system (ROS)*, pages 3–39. Springer, 2017.
- [6] D. Falanga, P. Foehn, P. Lu, and D. Scaramuzza. Pampc: Perception-aware model predictive control for quadrotors. In *2018 IEEE/RSJ International Conference on Intelligent Robots and Systems (IROS)*, pages 1–8. IEEE, 2018.
- [7] Y. Wang, J. O’Keeffe, Q. Qian, and D. Boyle. Kinojgm: A framework for efficient and accurate quadrotor trajectory generation and tracking in dynamic environments. In *2022 International Conference on Robotics and Automation (ICRA)*, pages 11036–11043. IEEE, 2022.
- [8] J. Choi, F. Castaneda, C. J. Tomlin, and K. Sreenath. Reinforcement learning for safety-critical control under model uncertainty, using control lyapunov functions and control barrier functions. *arXiv preprint arXiv:2004.07584*, 2020.
- [9] C. Dawson, S. Gao, and C. Fan. Safe control with learned certificates: A survey of neural lyapunov, barrier, and contraction methods. *arXiv preprint arXiv:2202.11762*, 2022.
- [10] B. Zhou, F. Gao, L. Wang, C. Liu, and S. Shen. Robust and efficient quadrotor trajectory generation for fast autonomous flight. *IEEE Robotics and Automation Letters*, 4(4):3529–3536, 2019.
- [11] D. Harabor and A. Grastien. Online graph pruning for pathfinding on grid maps. In *Proceedings of the AAAI Conference on Artificial Intelligence*, volume 25, 2011.
- [12] W. Ding, W. Gao, K. Wang, and S. Shen. An efficient b-spline-based kinodynamic replanning framework for quadrotors. *IEEE Transactions on Robotics*, 35(6):1287–1306, 2019.
- [13] Z. Ding, T. Yang, K. Zhang, C. Xu, and F. Gao. Vid-fusion: Robust visual-inertial-dynamics odometry for accurate external force estimation. *arXiv preprint arXiv:2011.03993*, 2020.
- [14] F. Furrer, M. Burri, M. Achtelik, and R. Siegwart. Rotors—a modular gazebo mav simulator framework. In *Robot operating system (ROS)*, pages 595–625. Springer, 2016.
- [15] Y. Wu, Z. Ding, C. Xu, and F. Gao. External forces resilient safe motion planning for quadrotor. *arXiv preprint arXiv:2103.11178*, 2021.
